# Supplementary material for: Quantitative DNA Methylation Analysis of DLGAP2 Gene using Pyrosequencing in Schizophrenia with Tardive Dyskinesia: A Linear Mixed Model Approach
Source: PubMed Central journal article supplement (PMC6269460; doi:10.1038/s41598-018-35718-4), 2018-11-30
Supplement: 41598_2018_35718_MOESM1_ESM.pdf [file 41598_2018_35718_MOESM1_ESM.pdf]

# Quantitative DNA Methylation Analysis of *DLGAP2* Gene using Pyrosequencing in Schizophrenia with Tardive Dyskinesia: A Linear Mixed Model Approach

Yanli Li<sup>1,†</sup>, Kesheng Wang<sup>1,2\*,†</sup>, Ping Zhang<sup>1</sup>, Junchao Huang<sup>1</sup>, Huimei An<sup>1</sup>, Nianyang Wang<sup>3</sup>, Fu De Yang<sup>1</sup>, Zhiren Wang<sup>1</sup>, Shuping Tan<sup>1</sup>, Song Chen<sup>1</sup>, Yunlong Tan<sup>1\*</sup>

GTAAAGAAAACACTACAGCCAAAAAGTGTGGCTTTTCAATATAAGATGAT  
 GGAAATGGGTAGAGTTCTAAAGGATGACCGTCCATTATCCACTGCAACTG  
 AGTCCTAGATTTGTTGCTAACTGACGTTCTACACAGCCTTTCTTCACTCGGAAATAGACGAGTGA  
 AAGTATTTCTGACTTCTCATTAGGAAGGAACAGTGGctatcatgtttgaataattatgcatctgttttttta  
 aacctcagtctggcaatactccatcgcgatgaatcttactactcagcctgcctggggaggctt

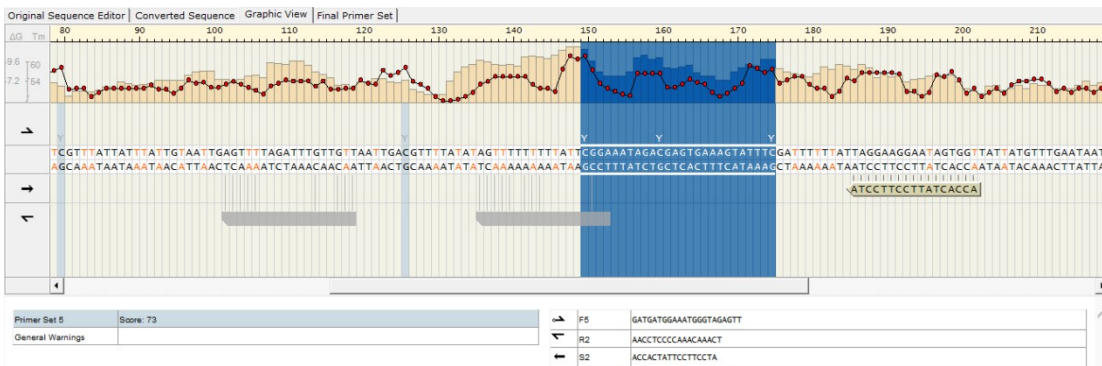

**Figure S1.** Pyrosequencing primer sequences in the *DLGAP2* gene. This figure shows the sequence of primer of *DLGAP2* gene in the dark area.

Assay: 5. DLGAP2-S  
Sample ID: 21  
Sequence to analyze: ATAAAAATCRAAATACTTTCACCTCRTCATTTCRAATAAAAAAACTATATAAAC  
Analysis parameters have been edited.

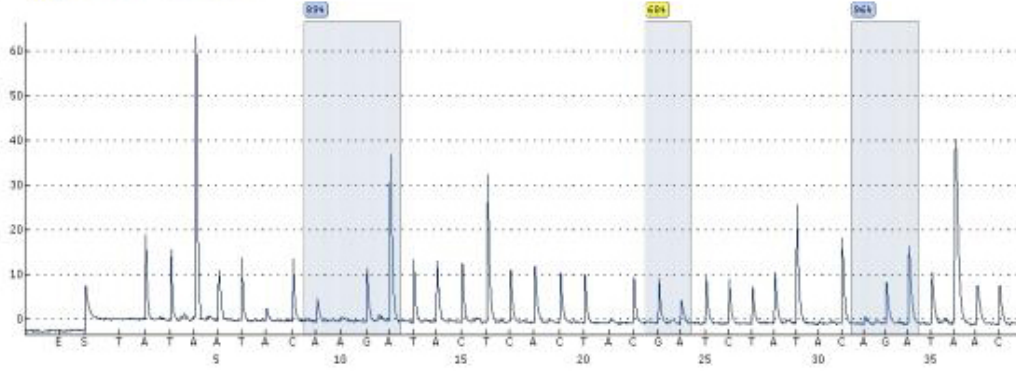

Figure S2. Peaks of three CpG sites (dark areas) in *DLGAP2* promoter region.
